# Supplementary material
Source: publisher figshare collection journal article supplement (https://sage.figshare.com/ndownloader/files/16450355)
Supplement: Supplementary file 1 [file 16450355]

Contents**Stereotype Misperception Task Procedure**

All experiments instructions

All Experiments Post Study Measures

Post study measures

Demographic questions

Welcome to this experiment!

**It is very important that you read all instructions carefully.**

All information obtained in this study will be strictly confidential and will only be viewed by research personnel.

<Press the spacebar to continue>

This study is about impression formation under suboptimal conditions. We ask you to quickly form impressions of various people. We will show you blurred drawings of various people, each at a time. The drawings will be flashed very quickly and then covered by a grey pattern mask.

**Your task is to quickly form an impression of each person: Is this person threatening?**

In particular, we want you to indicate whether this person is **more or less threatening than the other people you are seeing during this task**. Thus, you are asked to make a relative (not an absolute) judgment. This means that you would respond to half of the people with "less threatening" and to the other half of the people with "more threatening".

Rely on your first impression and go with your **“gut” feelings**. There are no correct or wrong answers. Respond as quickly as possible.

- If you feel the person is **less threatening** than the other people press **‘D’**.
- If you feel the person is **more threatening** than the other people press **‘K’**.

You can practice this task now. Please, press the spacebar.

This study is about impression formation under suboptimal conditions. We ask you to quickly form impressions of various people. We will show you blurred drawings of various people, each at a time. The drawings will be flashed very quickly and then covered by a grey pattern mask.

**Your task is to quickly form an impression of each person: Is this person threatening?**

In particular, we want you to indicate whether this person is **more or less threatening than the other people you are seeing during this task**. Thus, you are asked to make a relative (not an absolute) judgment. This means that you would respond to half of the people with "less threatening" and to the other half of the people with "more threatening".

Rely on your first impression and go with your **“gut” feelings**. There are no correct or wrong answers. Respond as quickly as possible.

- If you feel the person is **less threatening** than the other people press **‘D’**.
- If you feel the person is **more threatening** than the other people press **‘K’**.

<Press the spacebar to continue>

**Now, you can practice a variation of the impression formation task.**

At the beginning of each trial, a picture of a person's face or a face-like shape will be presented to you immediately before the drawing of a face appears.

Do NOT respond to these pictures, but do **pay attention to them**. After you have finished the task, you will be asked questions about the people shown in these pictures.

Like in the previous trials, your main task is to quickly **form an impression of the person shown in the blurred drawings**:

- If you feel the person shown in the drawing is **less threatening** than the other people shown in the drawings press '**D**'.
- If you feel the person shown in the drawing is **more threatening** than the other people shown in the drawings press '**K**'.

Rely on your immediate "gut" feeling when forming an impression!

You can practice this task now. Please, press the spacebar.

## Variation of the impression formation task

At the beginning of each trial, a picture of a person's face or a face-like shape will be presented to you immediately before the drawing of a face appears.

Do NOT respond to these pictures, but do **pay attention to them**. After you have finished the task, you will be asked questions about the people shown in these pictures.

Like in the previous trials, your main task is to quickly **form an impression of the person shown in the blurred drawings**:

- If you feel the person shown in the drawing is **less threatening** than the other people shown in the drawings press '**D**'.
- If you feel the person shown in the drawing is **more threatening** than the other people shown in the drawings press '**K**'.

Rely on your immediate "gut" feeling when forming an impression!

<Press the spacebar to continue>

**Post Study Measures in all experiments (always after attention check, and exploratory questions):**

1. Have you ever done a similar task in another study here in Young Hall? If yes, please describe the task as detailed as possible. (Fill-in the blank)
2. Due to computer problems a little icon (similar to the icons below) might have been presented to you in the previous task instead of the usual pictures. Did this happen? If yes, please estimate on how many trials this happened. (Fill-in the blank)
3. Do you have any comments about the previous task? (Fill-in the blank)

**Demographic questions**

**Please respond to the following personal questions.**

1. What is your gender? (female/male/other gender identity)
2. What is your ethnicity (Fill-in the blank)
3. How old are you? (Fill-in the blank)
4. Please enter the last 6 digits of your student ID number so that we may give you credit.
